# Supplementary material for: Effect of Biosynthesized ZnO Nanoparticles on Multi-Drug Resistant Pseudomonas Aeruginosa
Source: PubMed Central journal article supplement (PMC7277366; doi:10.3390/antibiotics9050260), 2020-05-17
Supplement: antibiotics-09-00260-s001.pdf [file antibiotics-09-00260-s001.pdf]

## Supplementary Materials

Table S1: Effect of different concentration of BM-ZnO NPs on different virulence factors of PAO1.

| PAO1 (Treated with ZnO NPs) |                 |                                |                          |                          |
|-----------------------------|-----------------|--------------------------------|--------------------------|--------------------------|
| Virulence factors           | Control         | Treatment ( $\mu\text{g/mL}$ ) |                          |                          |
|                             |                 | 100 ( $\mu\text{g/mL}$ )       | 200 ( $\mu\text{g/mL}$ ) | 300 ( $\mu\text{g/mL}$ ) |
| Pyocyanin                   | 5.30 $\pm$ 0.04 | 3.80 $\pm$ 0.15 *              | 2.93 $\pm$ 0.13 *        | 1.94 $\pm$ 0.06 *        |
| Protease                    | 18.6 $\pm$ 1.15 | 17.3 $\pm$ 2.51                | 14.6 $\pm$ 0.57 *        | 12 $\pm$ 1 *             |
| Hemolysin                   | 19.3 $\pm$ 1.1  | 15.6 $\pm$ 1.1 *               | 13.6 $\pm$ 0.57 *        | 10.6 $\pm$ 1.15 *        |

Pyocyanin concentration is represented as  $\mu\text{g/mL}$ ; Protease and Hemolysin is represented as zone of lysis in mm,  $\pm$  means standard deviation, \* means significant values  $p \leq 0.05$ .

Table S2: Effect of different concentration of BM-ZnO NPs on pyocyanin production by clinical isolates of *P. aeruginosa*.

| Isolates | Pyocyanin       |                                |                   |                   |
|----------|-----------------|--------------------------------|-------------------|-------------------|
|          | Control         | Treatment ( $\mu\text{g/mL}$ ) |                   |                   |
|          |                 | 100                            | 200               | 300               |
| P1       | 6.02 $\pm$ 0.13 | 3.81 $\pm$ 0.38 *              | 3.09 $\pm$ 0.13 * | 2.26 $\pm$ 0.16 * |
| P2       | 5.81 $\pm$ 0.14 | 3.68 $\pm$ 0.18 *              | 2.88 $\pm$ 0.08 * | 2.01 $\pm$ 0.11 * |
| P3       | 5.16 $\pm$ 0.11 | 3.75 $\pm$ 0.07 *              | 2.61 $\pm$ 0.17 * | 1.75 $\pm$ 0.25 * |
| P4       | 5.83 $\pm$ 0.26 | 4.45 $\pm$ 0.10 *              | 3.16 $\pm$ 0.23 * | 2.14 $\pm$ 0.25 * |
| P5       | 6.27 $\pm$ 0.13 | 4.69 $\pm$ 0.09 *              | 2.86 $\pm$ 0.09 * | 2.02 $\pm$ 0.13 * |
| P6       | 5.54 $\pm$ 0.16 | 3.8 $\pm$ 0.05 *               | 2.64 $\pm$ 0.19 * | 2.01 $\pm$ 0.30 * |
| P7       | 5.26 $\pm$ 0.15 | 3.55 $\pm$ 0.13 *              | 2.62 $\pm$ 0.06 * | 2.18 $\pm$ 0.13 * |
| P8       | 5.36 $\pm$ 0.06 | 3.66 $\pm$ 0.08 *              | 2.8 $\pm$ 0.16 *  | 1.98 $\pm$ 0.21 * |
| P9       | 5.54 $\pm$ 0.08 | 3.78 $\pm$ 0.11 *              | 2.76 $\pm$ 0.14 * | 1.93 $\pm$ 0.09 * |
| P10      | 5.39 $\pm$ 0.17 | 4.06 $\pm$ 0.13 *              | 2.96 $\pm$ 0.11 * | 2.13 $\pm$ 0.17 * |

Pyocyanin concentration is expressed as  $\mu\text{g/mL}$ ;  $\pm$  standard deviation; \* means significant values  $p \leq 0.05$ .

Table S3: Effect of different concentration of BM-ZnO NPs on protease production by clinical isolates of *P. aeruginosa*.

| Isolates | Protease         |                                |                    |                    |
|----------|------------------|--------------------------------|--------------------|--------------------|
|          | Control          | Treatment ( $\mu\text{g/mL}$ ) |                    |                    |
|          |                  | 100                            | 200                | 300                |
| P1       | 22 $\pm$ 2       | 18.66 $\pm$ 0.57               | 15.33 $\pm$ 1.15 * | 13.33 $\pm$ 1.15 * |
| P2       | 24 $\pm$ 2       | 21.66 $\pm$ 1.52               | 18.33 $\pm$ 1.52 * | 15.33 $\pm$ 0.57 * |
| P3       | 19.33 $\pm$ 1.15 | 17.33 $\pm$ 1.15               | 15.33 $\pm$ 1.15 * | 13 $\pm$ 1 *       |
| P4       | 21 $\pm$ 1       | 18.33 $\pm$ 0.57               | 16 $\pm$ 1 *       | 14.33 $\pm$ 1.15 * |
| P5       | 21.66 $\pm$ 1.52 | 20 $\pm$ 2                     | 18 $\pm$ 2 *       | 15 $\pm$ 1.73 *    |
| P6       | 21.66 $\pm$ 1.52 | 20.33 $\pm$ 0.57               | 18.33 $\pm$ 1.52 * | 15 $\pm$ 1 *       |
| P7       | 20.66 $\pm$ 1.52 | 19 $\pm$ 1                     | 16.66 $\pm$ 1.15 * | 14 $\pm$ 1 *       |
| P8       | 20.33 $\pm$ 0.57 | 18.66 $\pm$ 2.08               | 17 $\pm$ 2 *       | 13.66 $\pm$ 1.52 * |
| P9       | 21.33 $\pm$ 1.15 | 19.33 $\pm$ 0.57               | 18 $\pm$ 2 *       | 15 $\pm$ 1 *       |
| P10      | 20.66 $\pm$ 1.52 | 19 $\pm$ 1.57                  | 18.33 $\pm$ 1.52 * | 15.66 $\pm$ .57 *  |

Protease concentration mentioned as zone of lysis in mm;  $\pm$  means standard deviation, \* means significant values  $p \leq 0.05$ .

**Table S4:** Effect of different concentration BM-ZnO NPs on hemolysis production by clinical isolates of *P. aeruginosa*.

| Isolates | Hemolysin        |                                |                    |                    |
|----------|------------------|--------------------------------|--------------------|--------------------|
|          | Control          | Treatment ( $\mu\text{g/mL}$ ) |                    |                    |
|          |                  | 100                            | 200                | 300                |
| P1       | 22.66 $\pm$ 1.15 | 16 $\pm$ 1 *                   | 14 $\pm$ 1*        | 10.66 $\pm$ 1.15 * |
| P2       | 25.33 $\pm$ 1.15 | 18 $\pm$ 2 *                   | 16 $\pm$ 1*        | 12.33 $\pm$ 0.57 * |
| P3       | 19.66 $\pm$ 1.52 | 16.8 $\pm$ 1 *                 | 15 $\pm$ 1*        | 13 $\pm$ 1 *       |
| P4       | 20.66 $\pm$ 1.15 | 16.66 $\pm$ 1.15 *             | 14.66 $\pm$ 1.15 * | 11.66 $\pm$ 1.52 * |
| P5       | 22 $\pm$ 2       | 20.33 $\pm$ 0.57 *             | 17.33 $\pm$ 1.15 * | 14 $\pm$ 1 *       |
| P6       | 21.66 $\pm$ 0.57 | 20.33 $\pm$ 0.57 *             | 18.33 $\pm$ 1.52 * | 15 $\pm$ 1 *       |
| P7       | 20.66 $\pm$ 1.15 | 19 $\pm$ 1 *                   | 16.66 $\pm$ 1.15 * | 14 $\pm$ 1 *       |
| P8       | 20.33 $\pm$ 1.52 | 18.33 $\pm$ 1.52 *             | 17 $\pm$ 2 *       | 13.66 $\pm$ 1.52 * |
| P9       | 21.33 $\pm$ 1.15 | 19.33 $\pm$ 0.57 *             | 18 $\pm$ 2 *       | 15 $\pm$ 1 *       |
| P10      | 21.66 $\pm$ 1.15 | 18.66 $\pm$ 0.57 *             | 16 $\pm$ 1 *       | 13.33 $\pm$ 0.57 * |

Hemolysis activity mentioned as zone of lysis in mm;  $\pm$  means standard deviation; \* means significant values  $p \leq 0.05$ .
